# Supplementary material for: Revisiting antibody modeling assessment for CDR-H3 loop
Source: PubMed Central journal article supplement — Protein Eng Des Sel. 2016 Oct 22;29(11):477–84. doi: 10.1093/protein/gzw028 (PMC5081041; doi:10.1093/protein/gzw028), 2016-10-22
Supplement: supp_gzw028_FigsSupple_modified.pdf [file supp_gzw028_FigsSupple_modified.pdf]

# **Supplementary Figures**

Figure S1

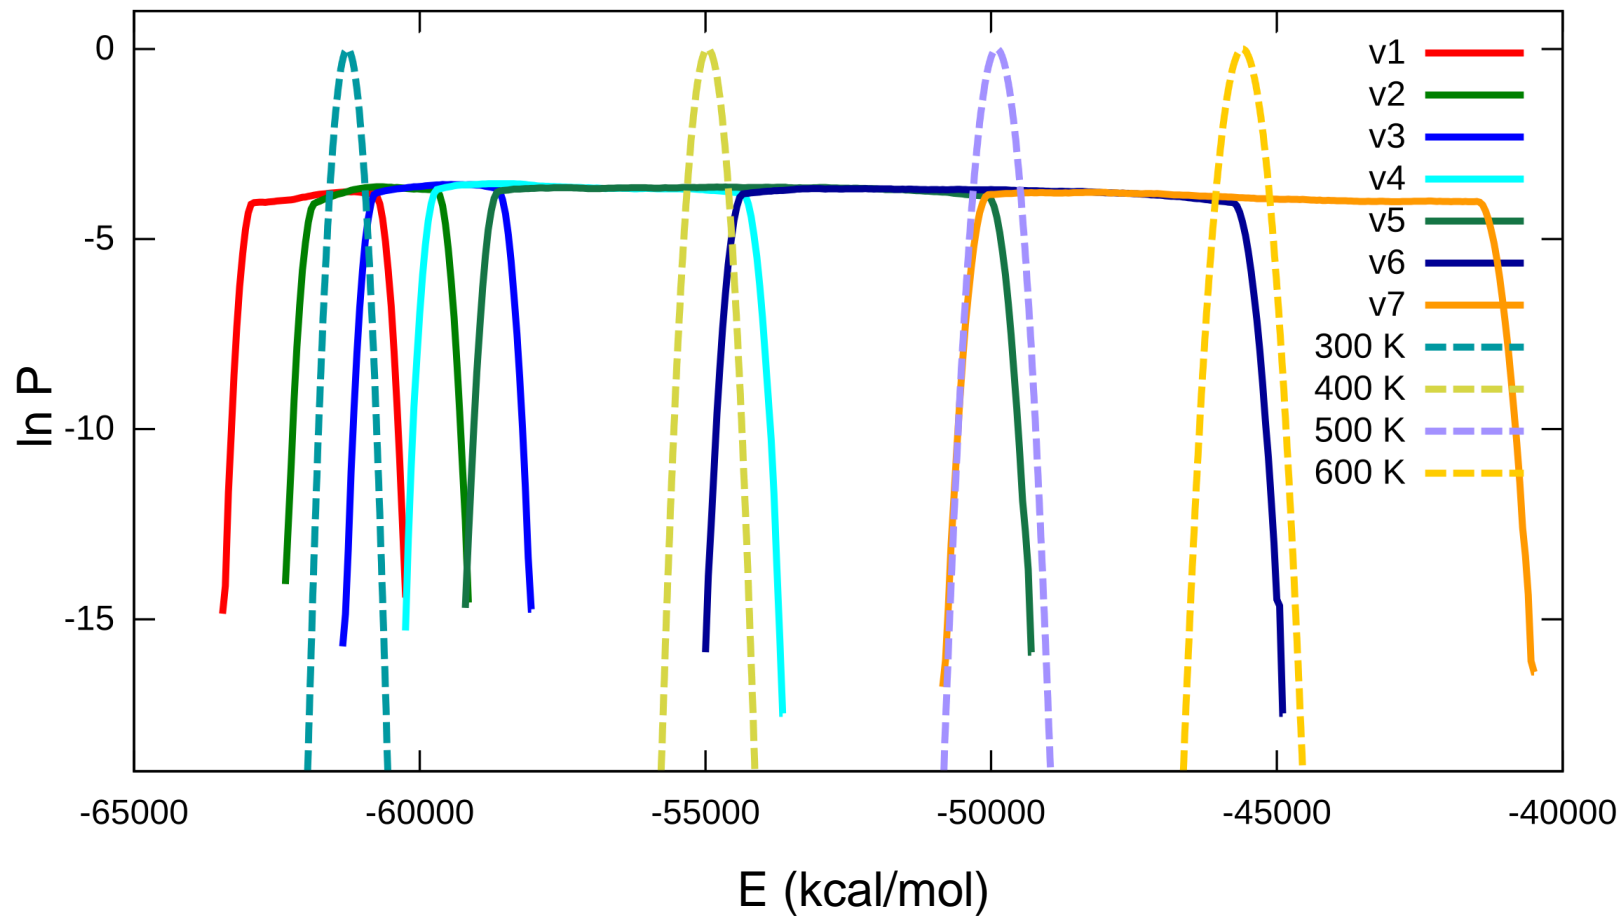

# Figure S2

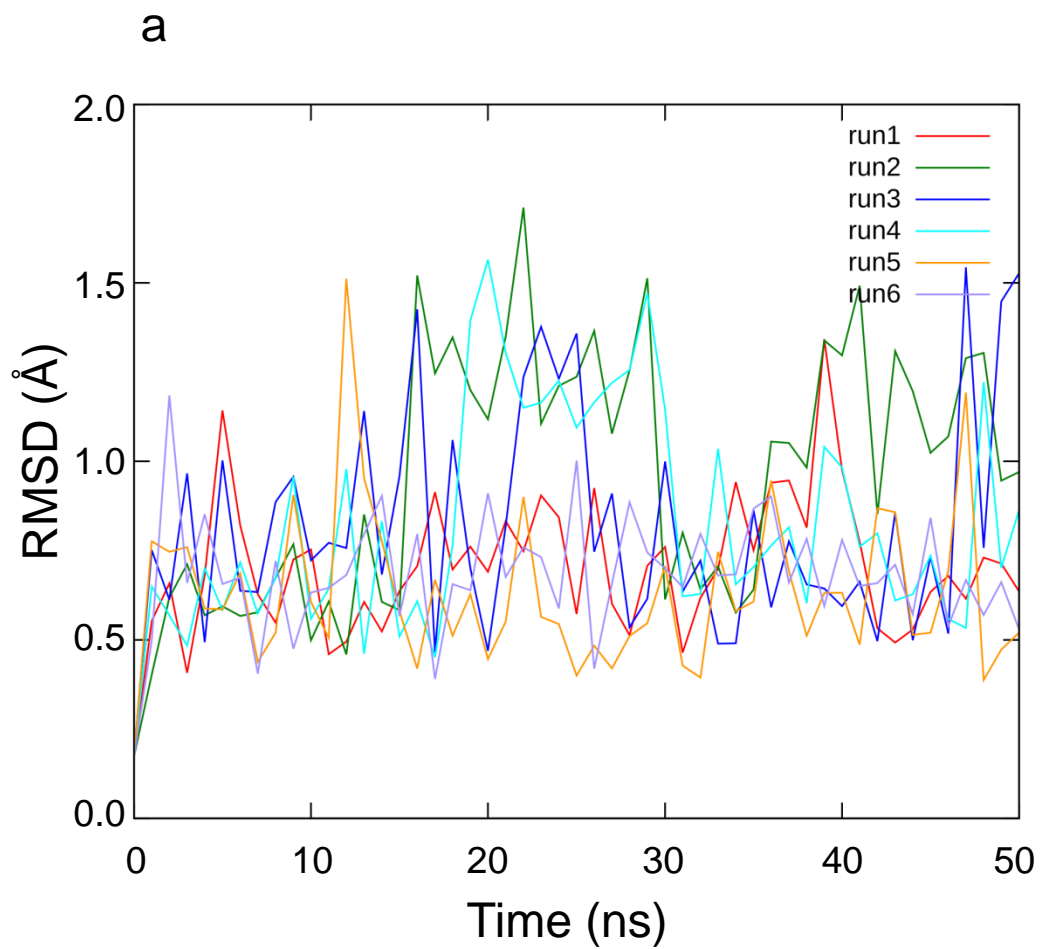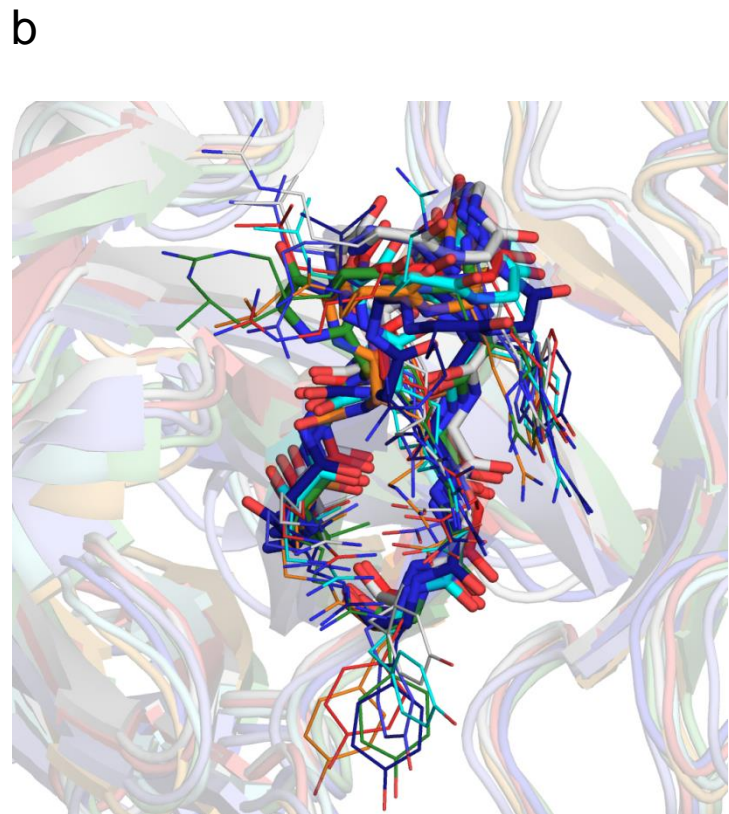

Figure S3

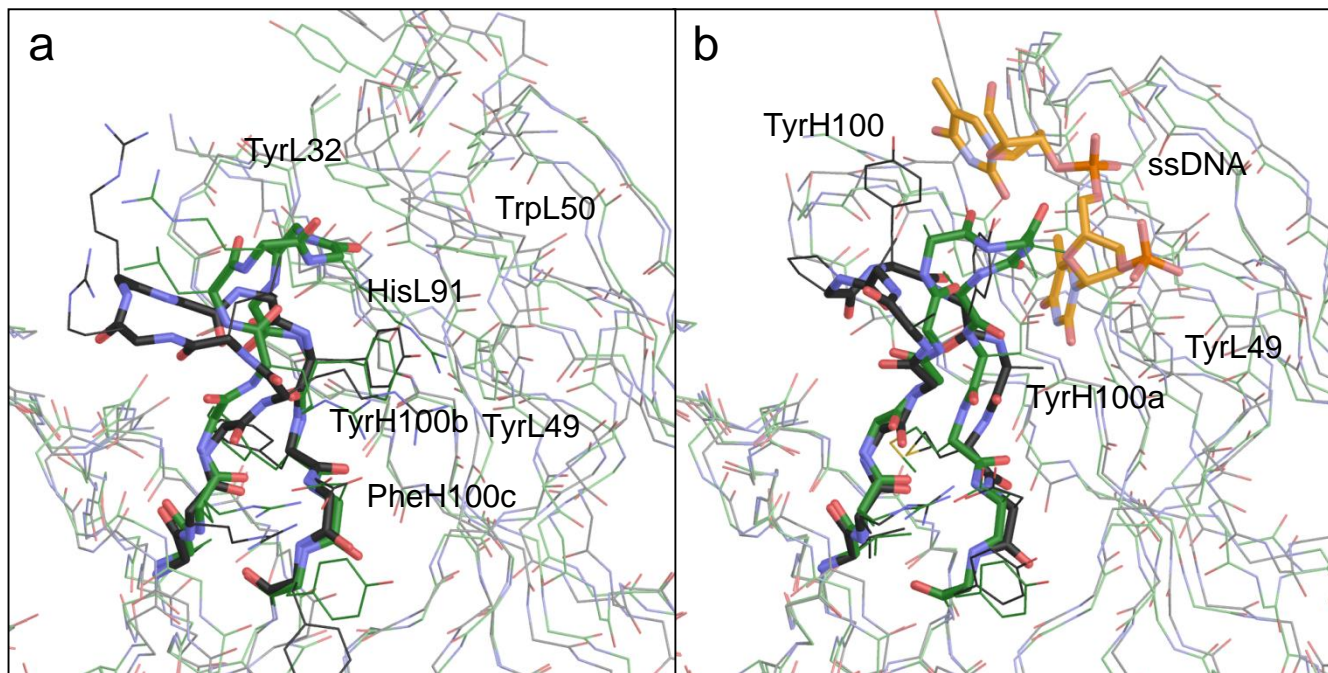

## Supplementary Figure Legends

**Fig. S1:** Probability distributions of the potential energy obtained from the TTP-V-McMD simulation ( $v1-v7$ ) and the reweighted canonical distributions at 300, 400, 500, and 600 K. Each curve corresponds to each distribution, according to the figure legend.

**Fig. S2:** (a) The RMSDs of the CDR-H3 loop along the canonical MD simulations. Each simulation from run1 to run6 is colored according to the legend in the figure. (b) Final structures of each canonical MD with the X-ray structure. The colors of the structures correspond to the trajectories in the legend of (a). The X-ray structure is colored gray.

**Fig. S3:** (a) The X-ray structure and our model a of the A52 antibody. The X-ray structure (PDBID 4m61, chains A and B) and our model a are colored green and black, respectively. (b) The X-ray structures of the apo- and holo-antibodies of the DNA-1 antibody. The apo-antibody (PDBID 1xf3, chains L and H) and the holo-antibody (PDBID 1xf2) with the bound antigen single-stranded DNA (ssDNA) are shown in green, black, and orange, respectively. The backbone atoms of the CDR-H3 loops and the ligand atoms are shown by thick stick models, and the others are depicted by thin wire models.
